# Supplementary material for: Dopamine receptors reveal an essential role of IFT-B, KIF17, and Rab23 in delivering specific receptors to primary cilia
Source: eLife journal article supplement (doi:10.7554/elife.06996), 2015-07-16
Supplement: supp [file elife-06996-supp-v1.zip]

Figure 5- figure supplement 1

|            |            |           |            |
|------------|------------|-----------|------------|
|            |            | Switch II |            |
| Kinesin-1: | TEQKLSGKLY | LVDLAGSE  | KVSKTGAEGA |
| KIF17:     | KDHLRAGKLN | LVDLAGSE  | RQSKTGATGE |
