# Supplementary material for: Dopamine receptors reveal an essential role of IFT-B, KIF17, and Rab23 in delivering specific receptors to primary cilia
Source: eLife journal article supplement (doi:10.7554/elife.06996), 2015-07-16
Supplement: supp [file elife-06996-supp-v1.zip]

Archive with 31 entries (31 files):
- elife_poa_e06996_Figure_5_figure_supplement_4.pdf
- elife_poa_e06996_Figure_7_figure_supplement_3.pdf
- elife_poa_e06996_Figure_6_figure_supplement_4.pdf
- elife_poa_e06996_Figure_3_figure_supplement_5.pdf
- elife_poa_e06996_Figure_7_figure_supplement_5.pdf
- elife_poa_e06996_Figure_4_figure_supplement_2.pdf
- elife_poa_e06996_Figure_3_figure_supplement_1.pdf
- elife_poa_e06996_Figure_2_figure_supplement_6.pdf
- elife_poa_e06996_Figure_5_figure_supplement_3.pdf
- elife_poa_e06996_Figure_4_figure_supplement_3.pdf
- elife_poa_e06996_Figure_3_figure_supplement_4.pdf
- elife_poa_e06996_Figure_5_figure_supplement_5.pdf
- elife_poa_e06996_Figure_7_figure_supplement_2.pdf
- elife_poa_e06996_Figure_2_figure_supplement_1.pdf
- elife_poa_e06996_Figure_7_figure_supplement_1.pdf
- elife_poa_e06996_Figure_3_figure_supplement_2.pdf
- elife_poa_e06996_Figure_8_figure_supplement_2.pdf
- elife_poa_e06996_Figure_8_figure_supplement_1.pdf
- elife_poa_e06996_Figure_3_figure_supplement_3.pdf
- elife_poa_e06996_Figure_4_figure_supplement_1.pdf
- elife_poa_e06996_Figure_2_figure_supplement_5.pdf
- elife_poa_e06996_Figure_2_figure_supplement_4.pdf
- elife_poa_e06996_Figure_2_figure_supplement_2.pdf
- elife_poa_e06996_Figure_5_figure_supplement_2.pdf
- elife_poa_e06996_Figure_7_figure_supplement_4.pdf
- elife_poa_e06996_Figure_6_figure_supplement_3.pdf
- elife_poa_e06996_Figure_5_figure_supplement_1.pdf
- elife_poa_e06996_Figure_6_figure_supplement_2.pdf
- elife_poa_e06996_Figure_2_figure_supplement_3.pdf
- elife_poa_e06996_Figure_6_figure_supplement_1.pdf
- elife_poa_e06996_Figure_2_figure_supplement_7.pdf
