# Supplementary figures and images for: Dopamine receptors reveal an essential role of IFT-B, KIF17, and Rab23 in delivering specific receptors to primary cilia
Source: eLife journal article supplement (doi:10.7554/elife.06996), 2015-07-16

Figure 3- figure supplement 2

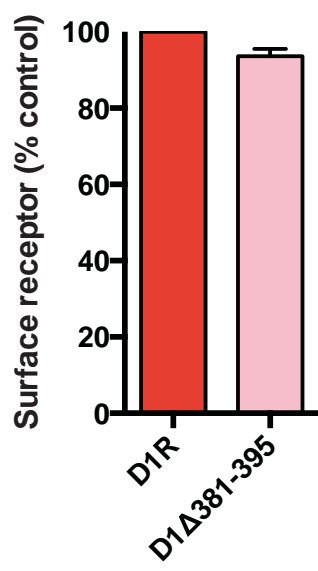

Supplement: supp [file elife-06996-supp-v1.zip]

Figure 8- figure supplement 2

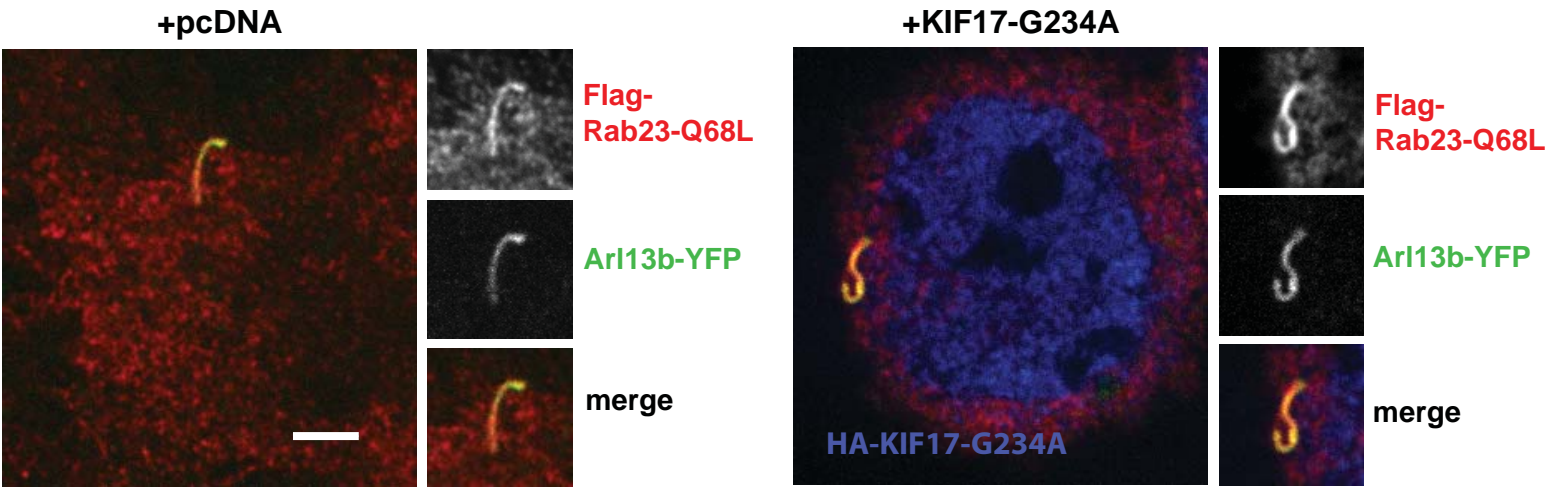

Supplement: supp [file elife-06996-supp-v1.zip]

Figure 5- figure supplement 2

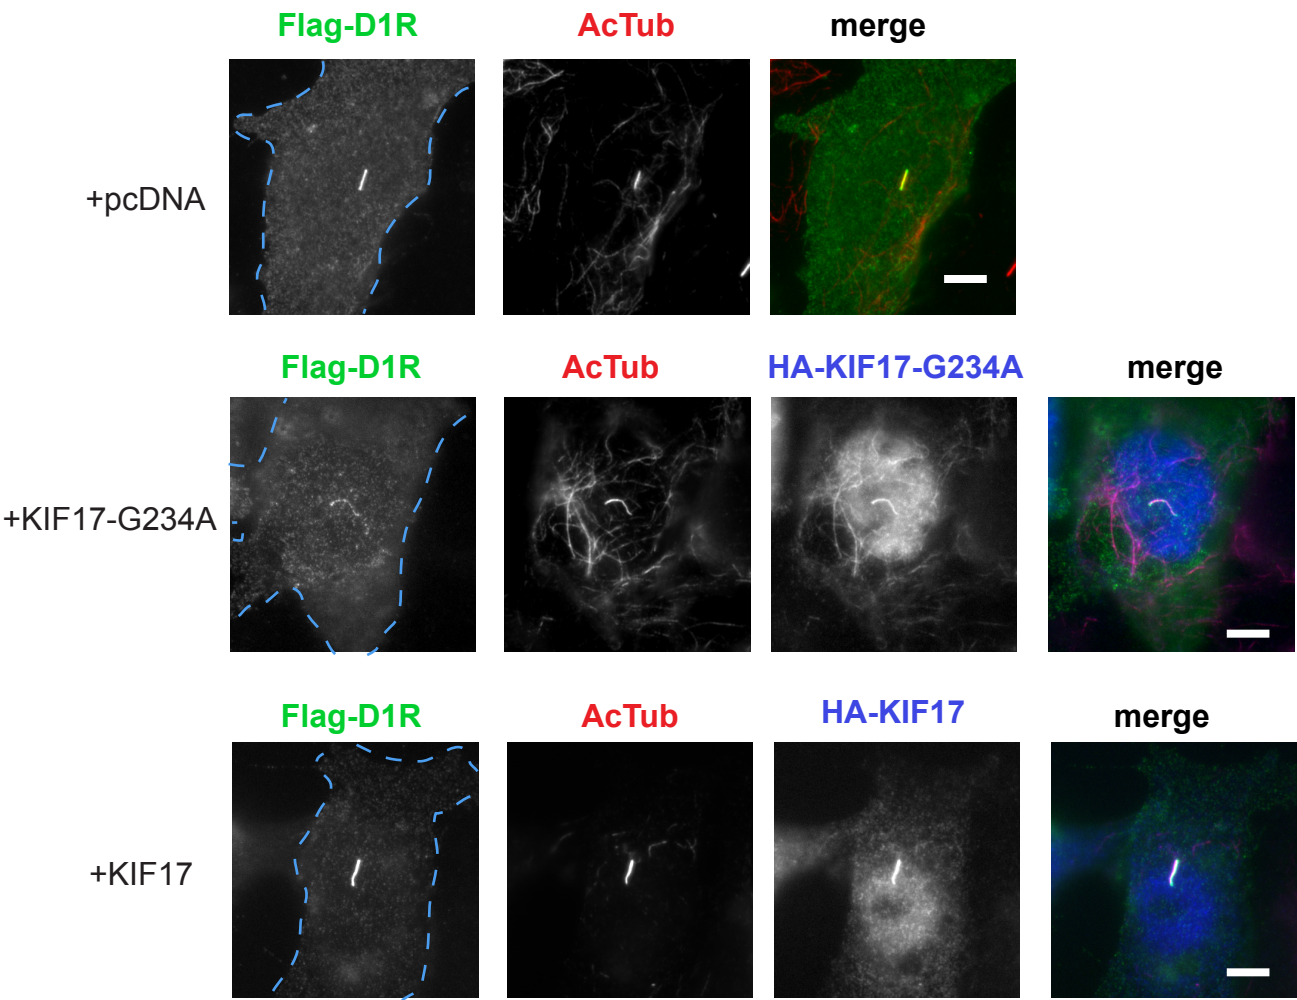

Supplement: supp [file elife-06996-supp-v1.zip]

Figure 2- figure supplement 2

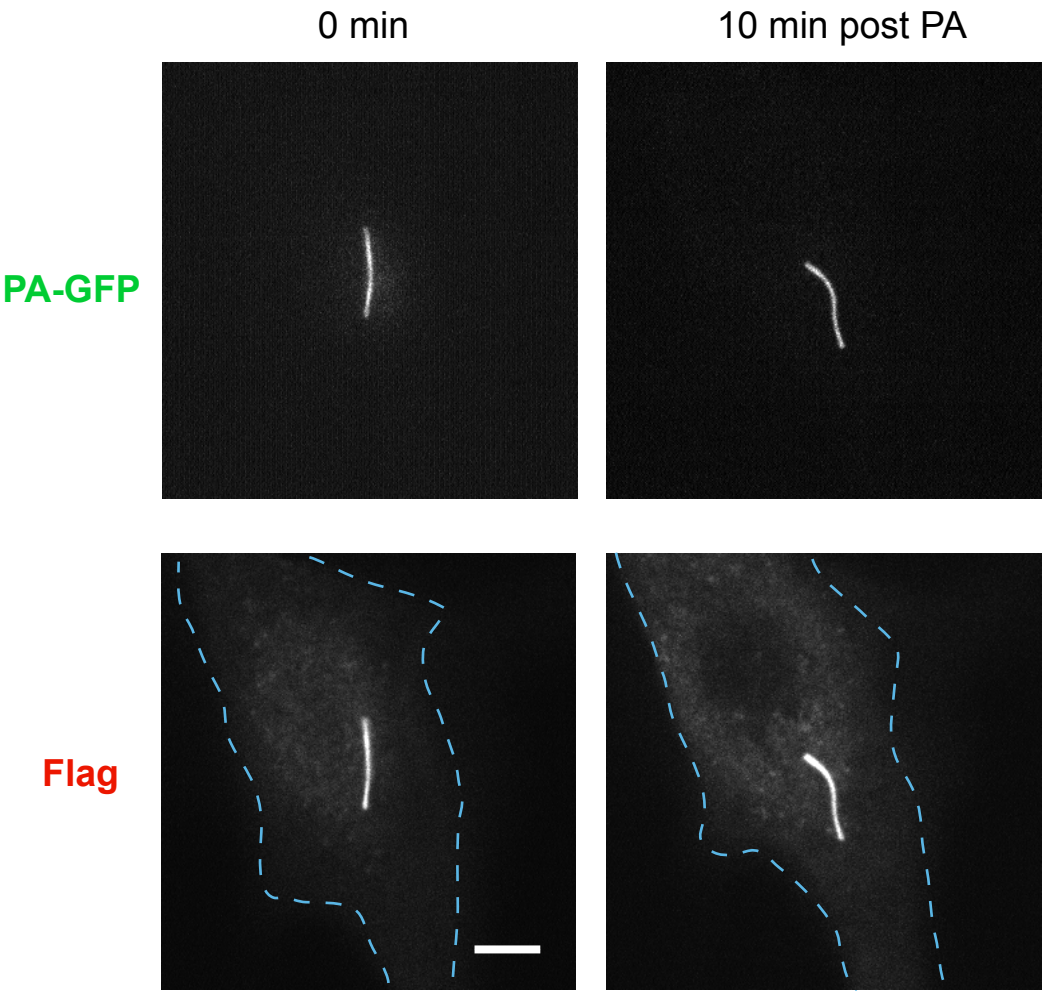

Supplement: supp [file elife-06996-supp-v1.zip]

Figure 5- figure supplement 5

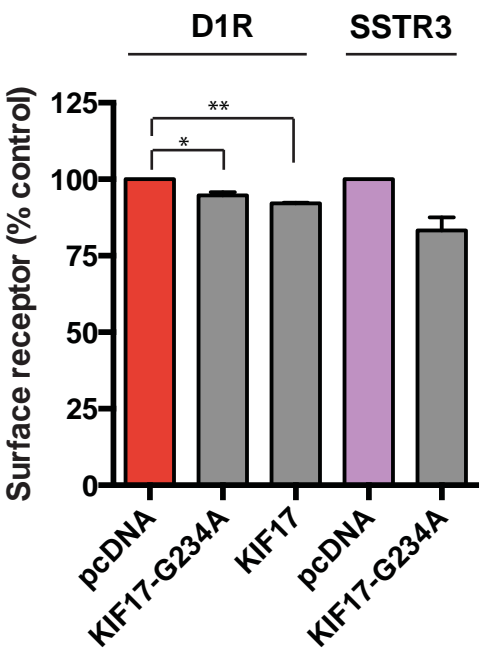

Supplement: supp [file elife-06996-supp-v1.zip]

**Figure 7- figure supplement 3**

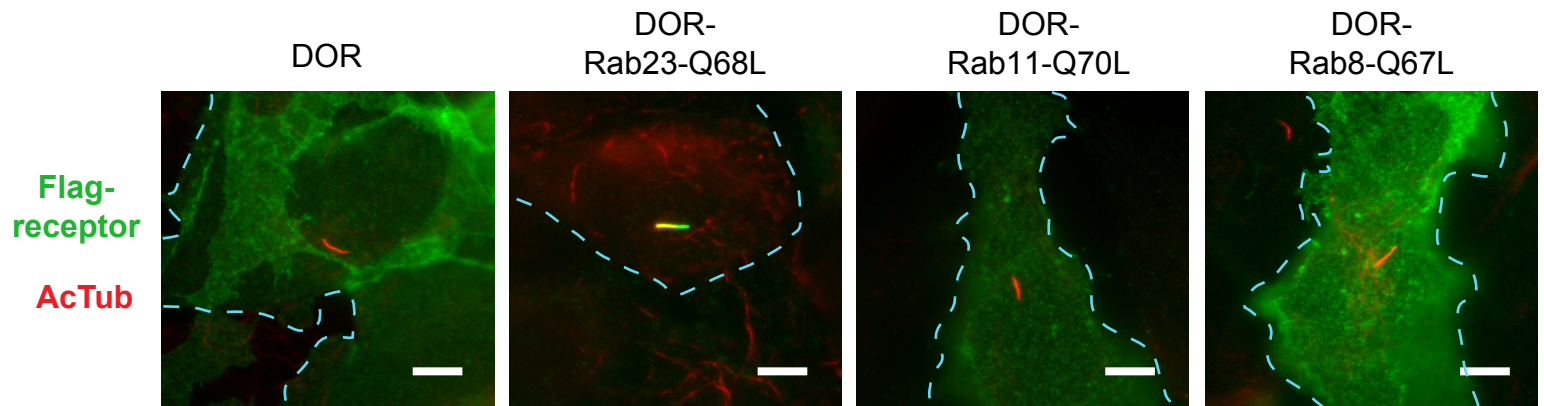

Supplement: supp [file elife-06996-supp-v1.zip]

**Figure 7- figure supplement 1**

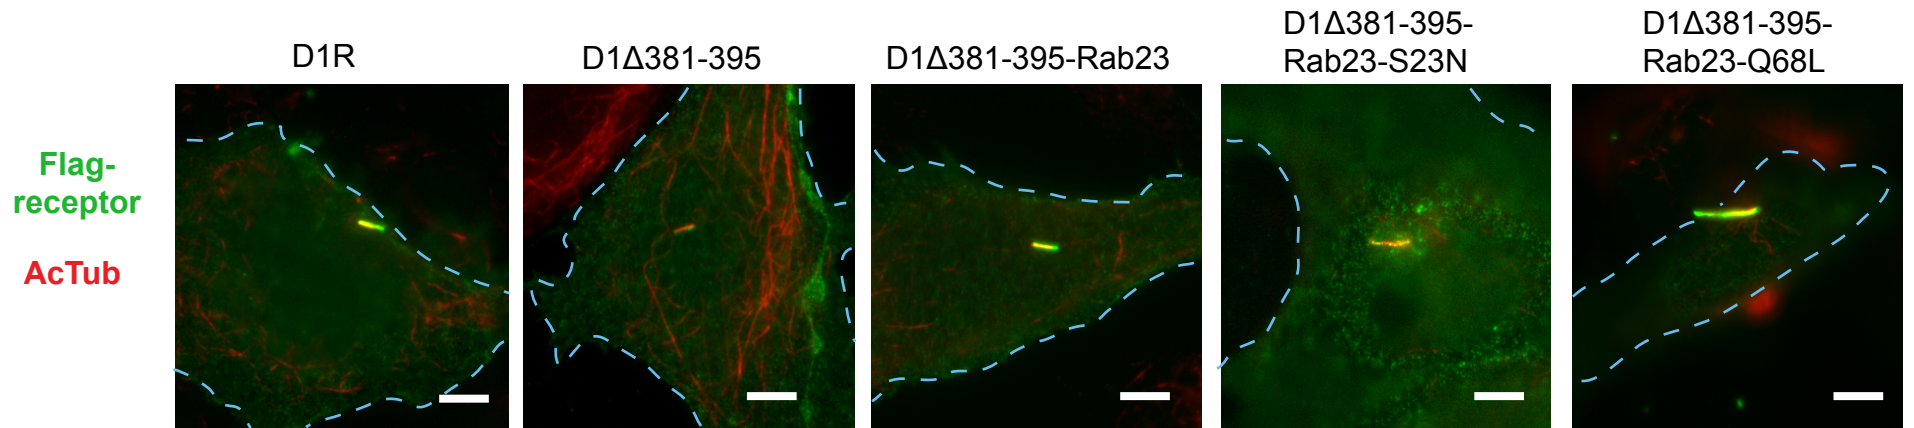

Supplement: supp [file elife-06996-supp-v1.zip]

Figure 2- figure supplement 7

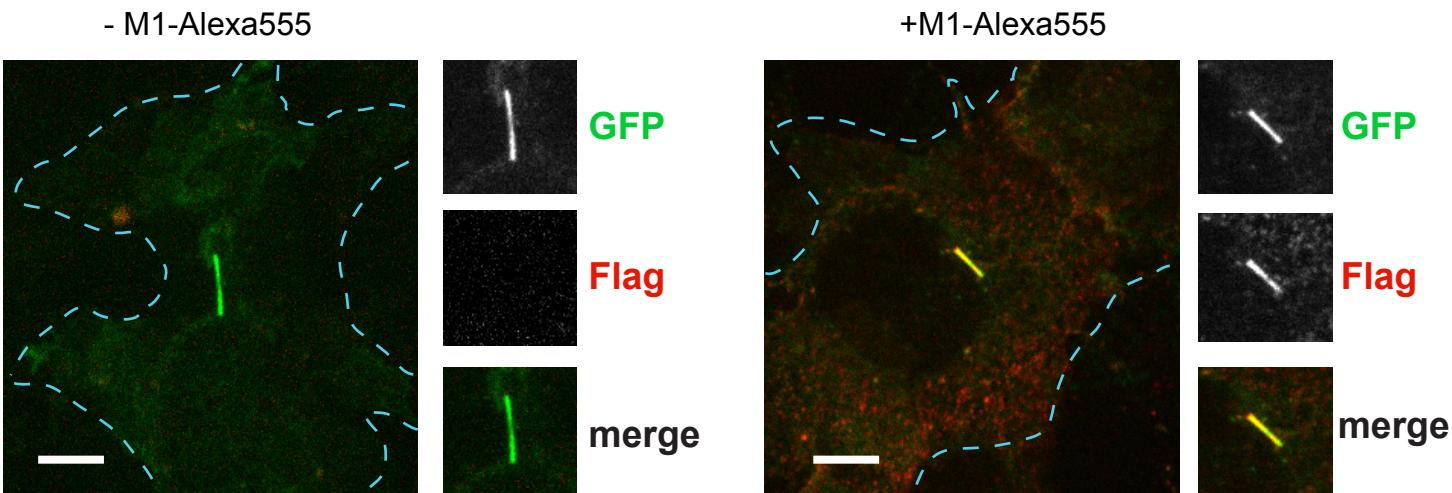

Supplement: supp [file elife-06996-supp-v1.zip]

Figure 5-figure supplement 3

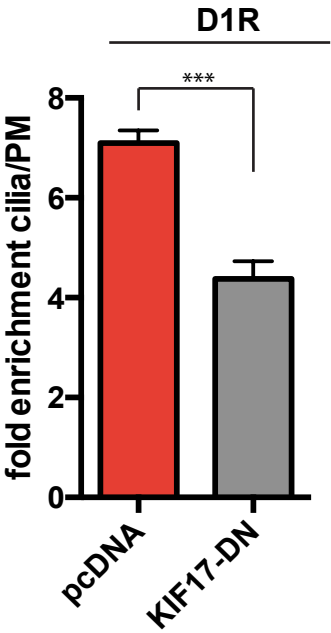

Supplement: supp [file elife-06996-supp-v1.zip]

**Figure 2- figure supplement 4**

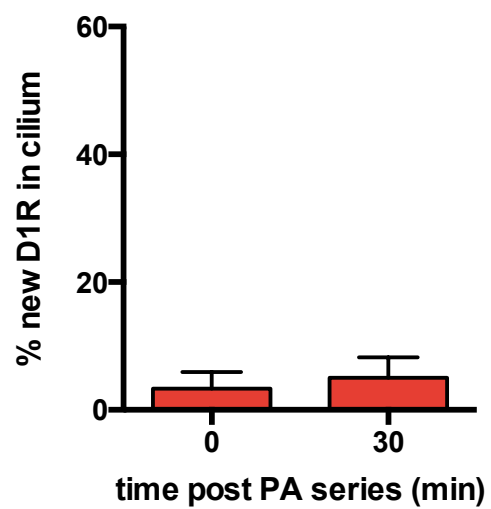

Supplement: supp [file elife-06996-supp-v1.zip]

Figure 4- figure supplement 3

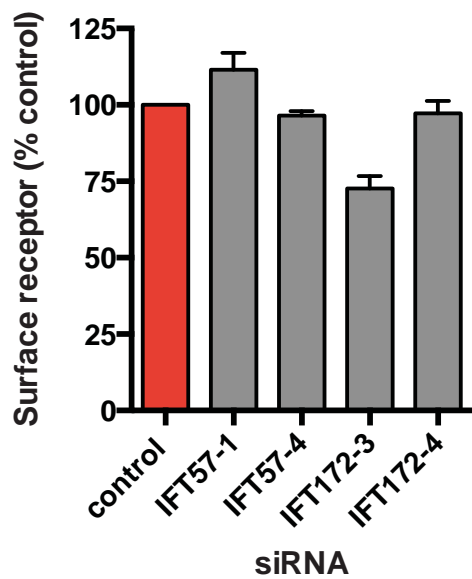

Supplement: supp [file elife-06996-supp-v1.zip]

Figure 7- figure supplement 2

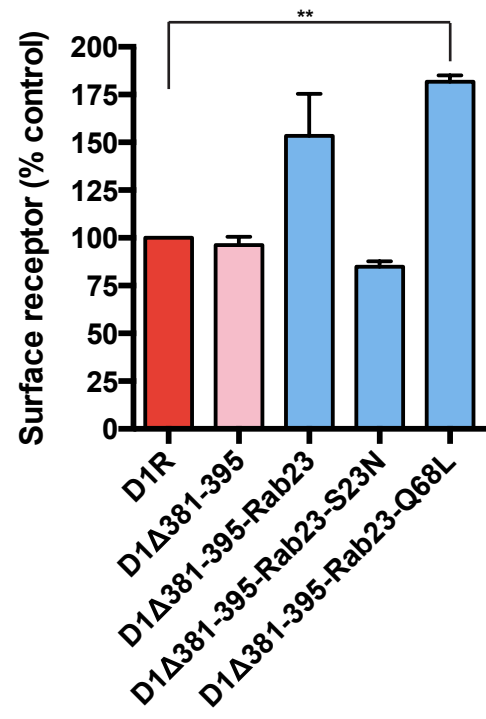

Supplement: supp [file elife-06996-supp-v1.zip]

**Figure 3- figure supplement 4**

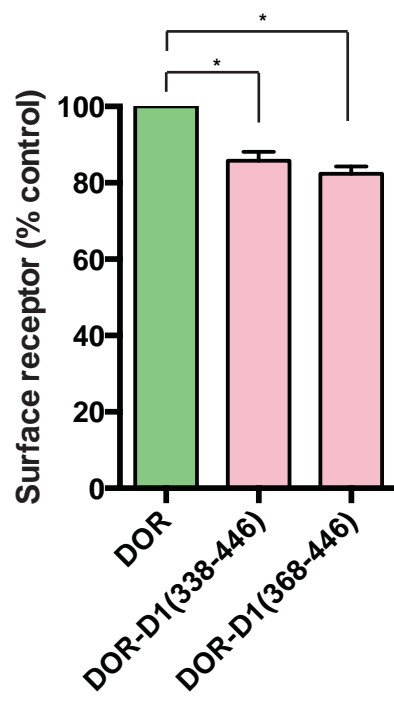

Supplement: supp [file elife-06996-supp-v1.zip]

Figure 4- figure supplement 2

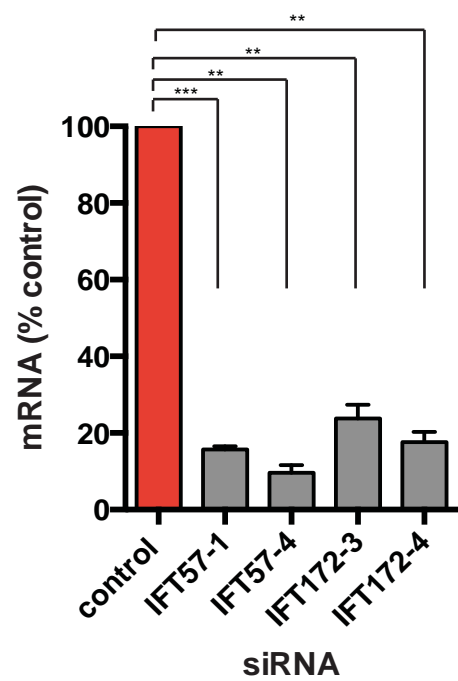

Supplement: supp [file elife-06996-supp-v1.zip]

**Figure 3- figure supplement 1**

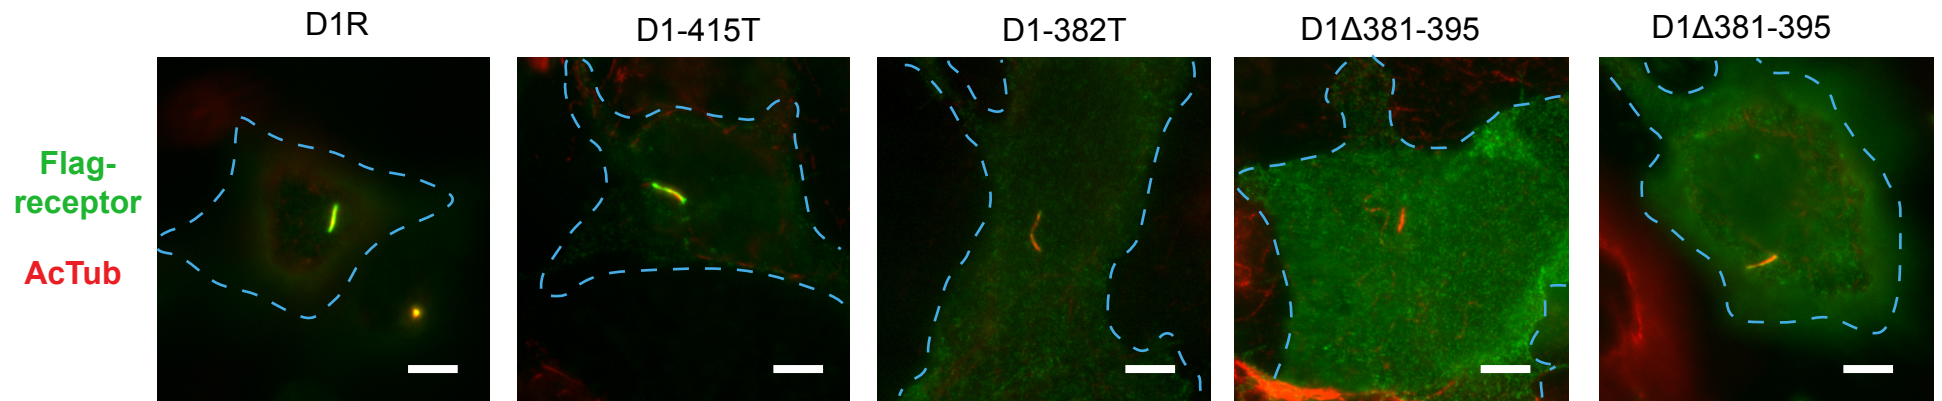

Supplement: supp [file elife-06996-supp-v1.zip]

Figure 2- figure supplement 1

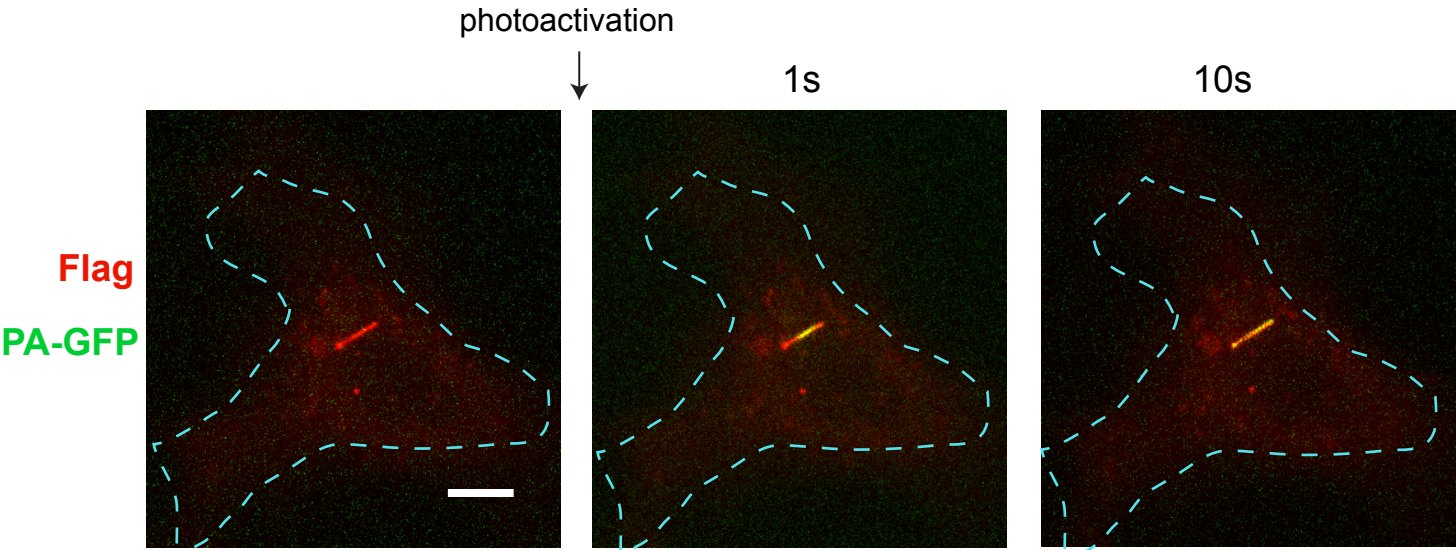

Supplement: supp [file elife-06996-supp-v1.zip]

Figure 4- figure supplement 1

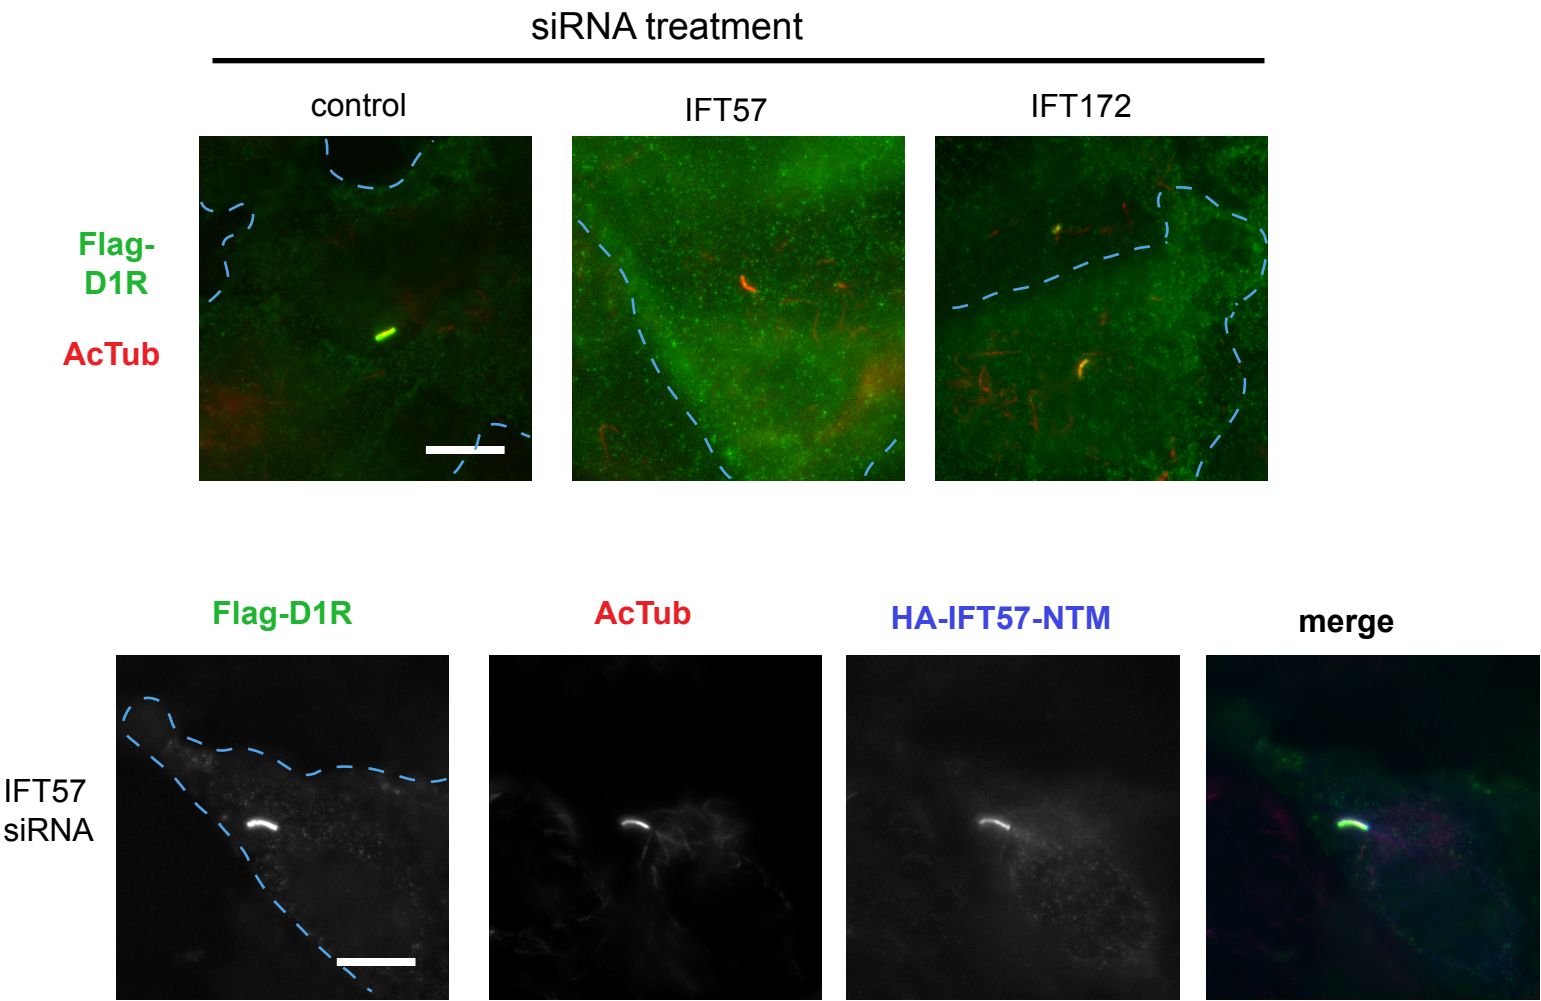

Supplement: supp [file elife-06996-supp-v1.zip]

Figure 6- figure supplement 4

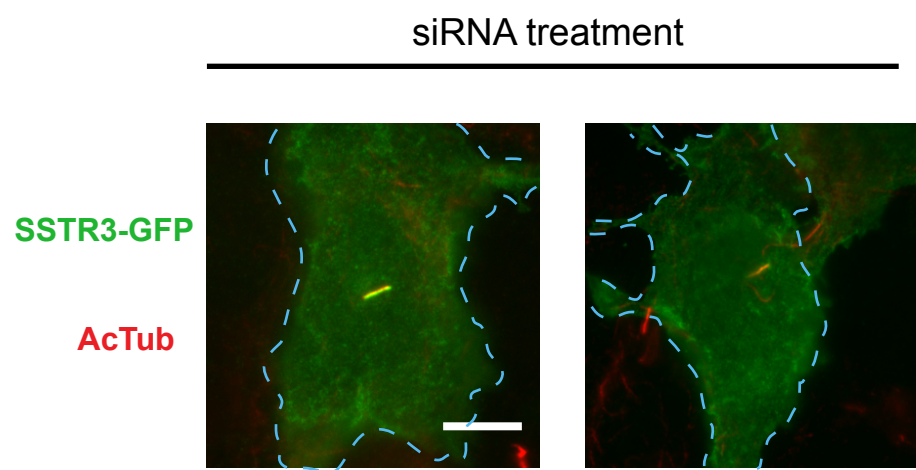

Supplement: supp [file elife-06996-supp-v1.zip]

Figure 2- figure supplement 3

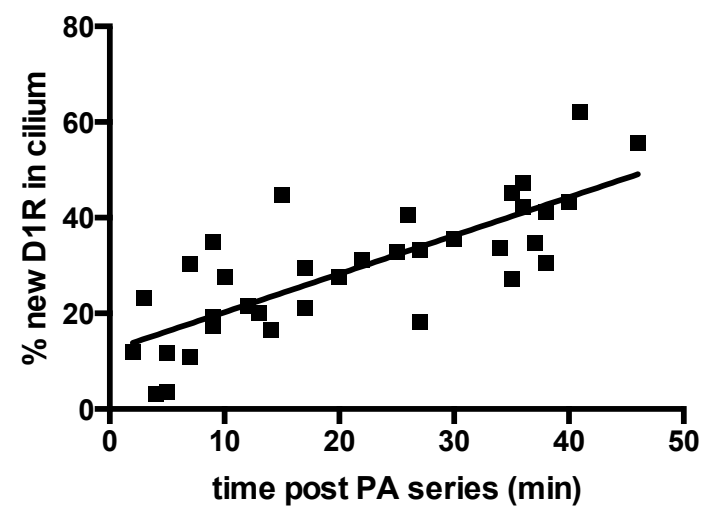

Supplement: supp [file elife-06996-supp-v1.zip]

Figure 7- figure supplement 4

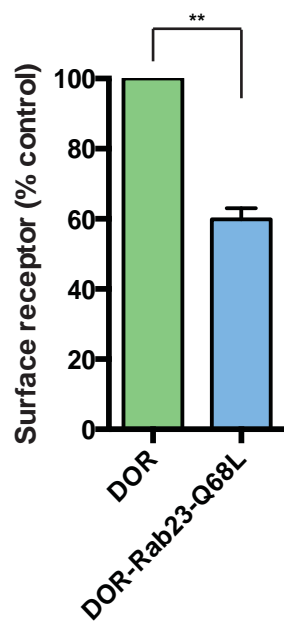

Supplement: supp [file elife-06996-supp-v1.zip]

Figure 2- figure supplement 6

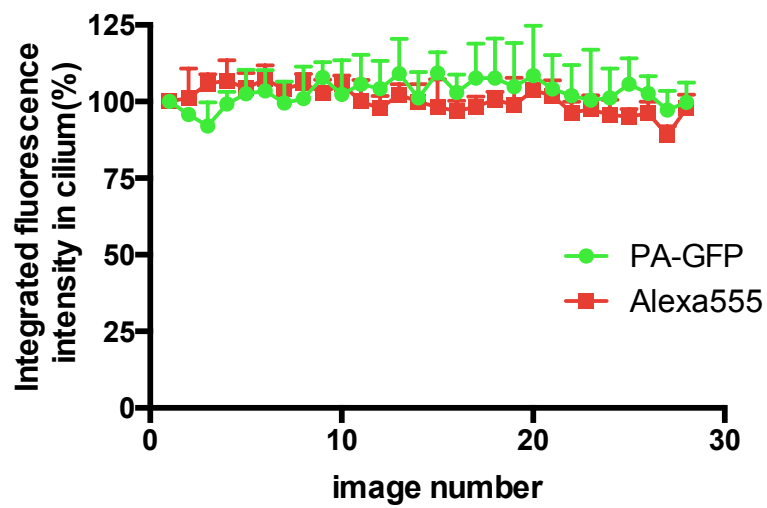

Supplement: supp [file elife-06996-supp-v1.zip]

Figure 3- figure supplement 3

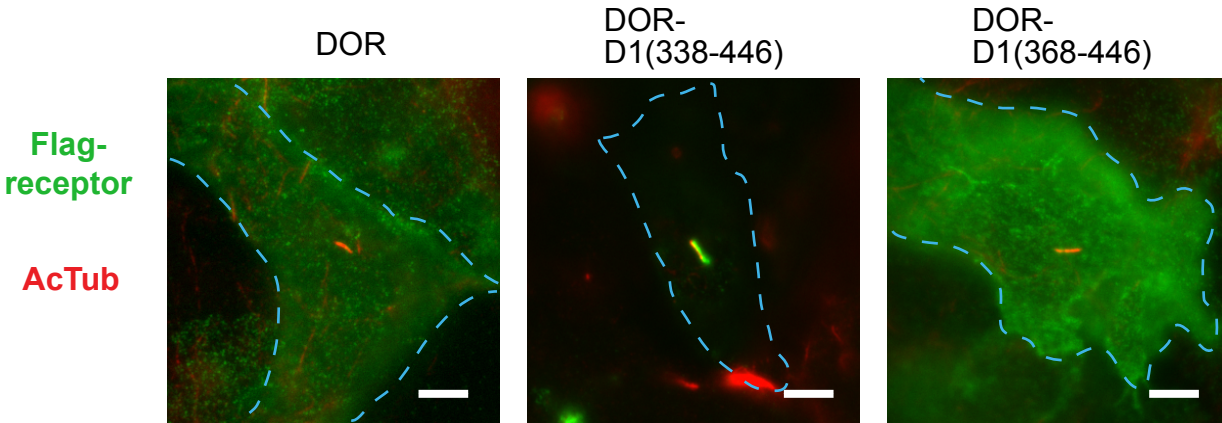

Supplement: supp [file elife-06996-supp-v1.zip]

**Figure 7- figure supplement 5**

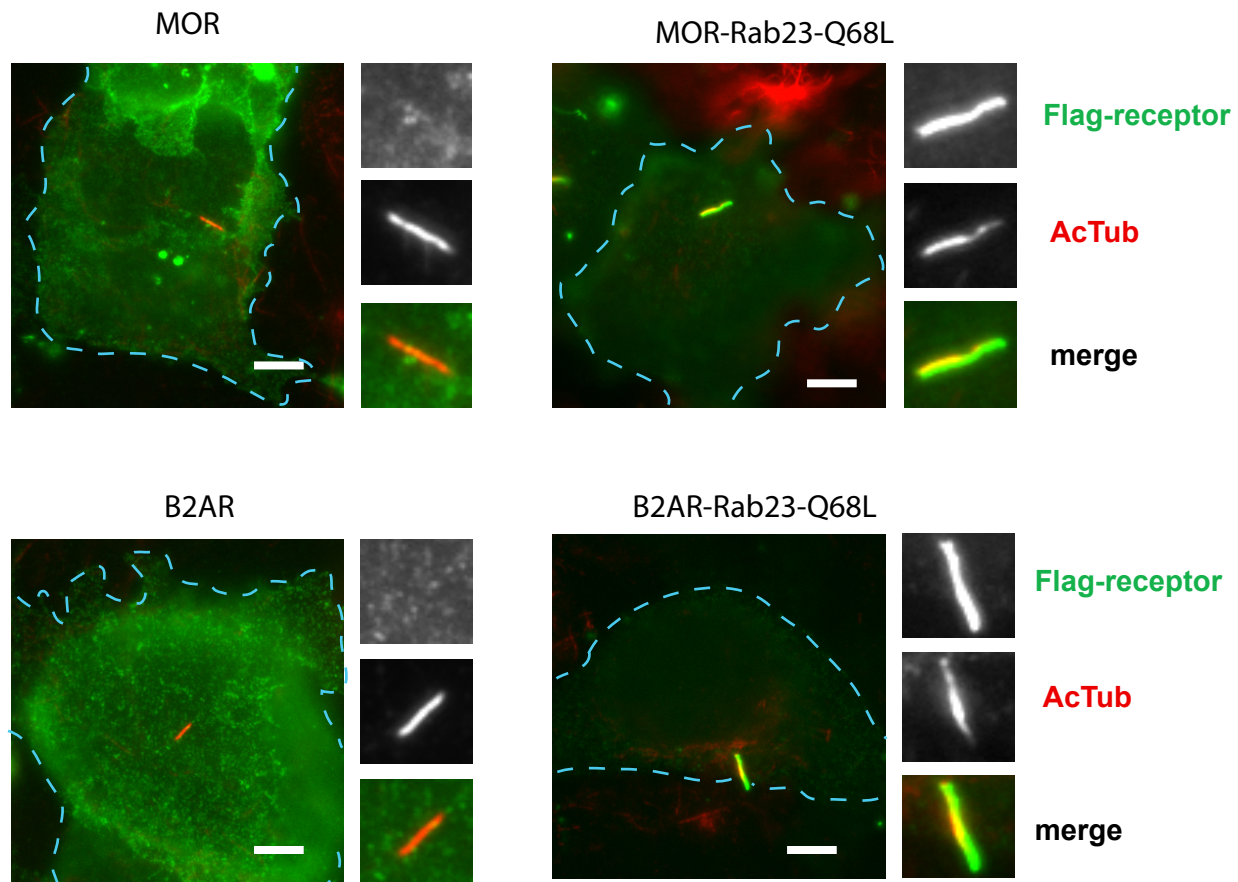

Supplement: supp [file elife-06996-supp-v1.zip]

Figure 6- figure supplement 3

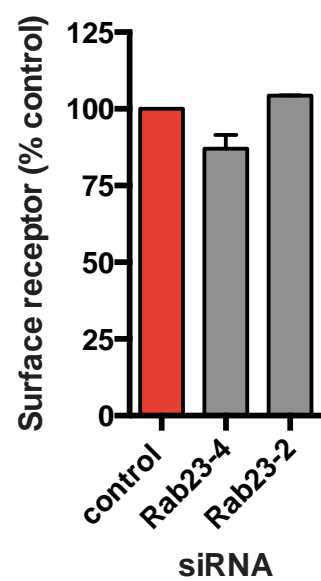

Supplement: supp [file elife-06996-supp-v1.zip]

Figure 5- figure supplement 4

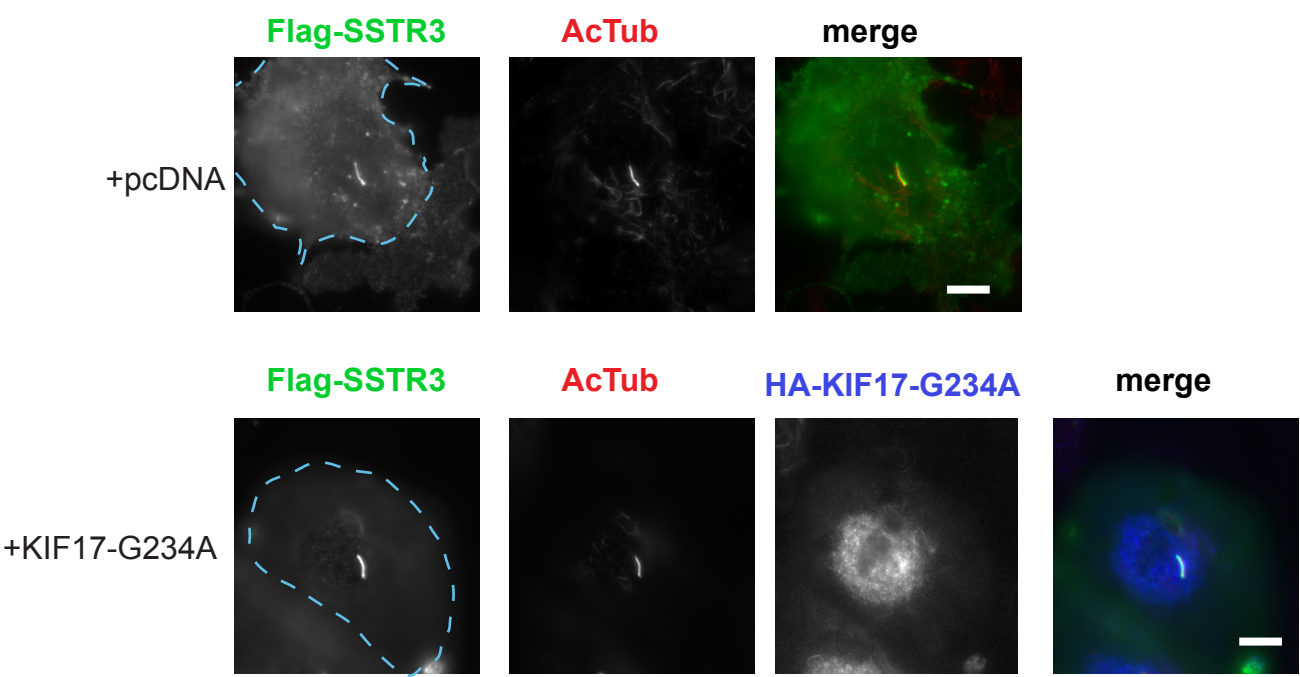

Supplement: supp [file elife-06996-supp-v1.zip]

Figure 6- figure supplement 1

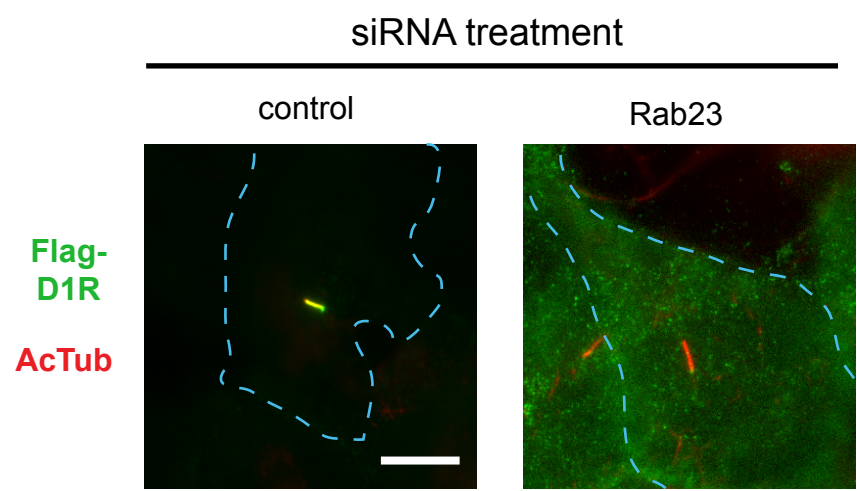

Supplement: supp [file elife-06996-supp-v1.zip]

Figure 3- figure supplement 5

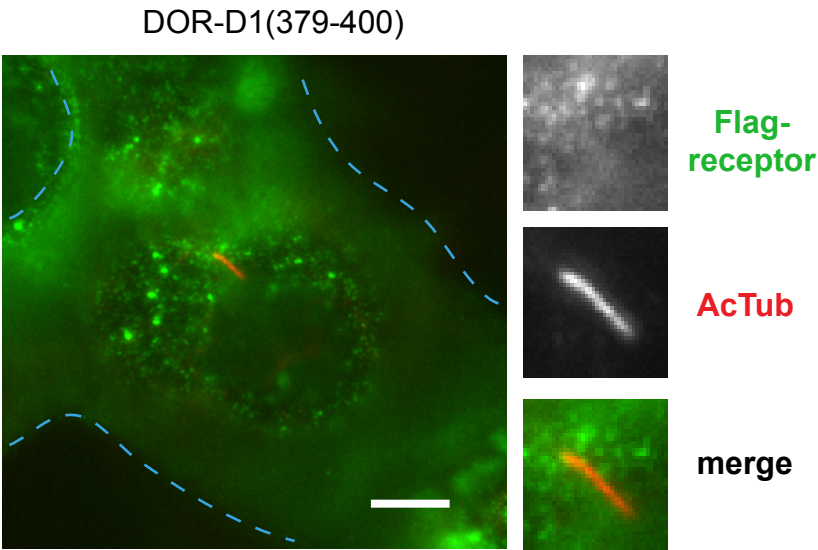

Supplement: supp [file elife-06996-supp-v1.zip › elife_poa_e06996_Figure_3_figure_supplement_5.pdf]

Figure 8- figure supplement 1

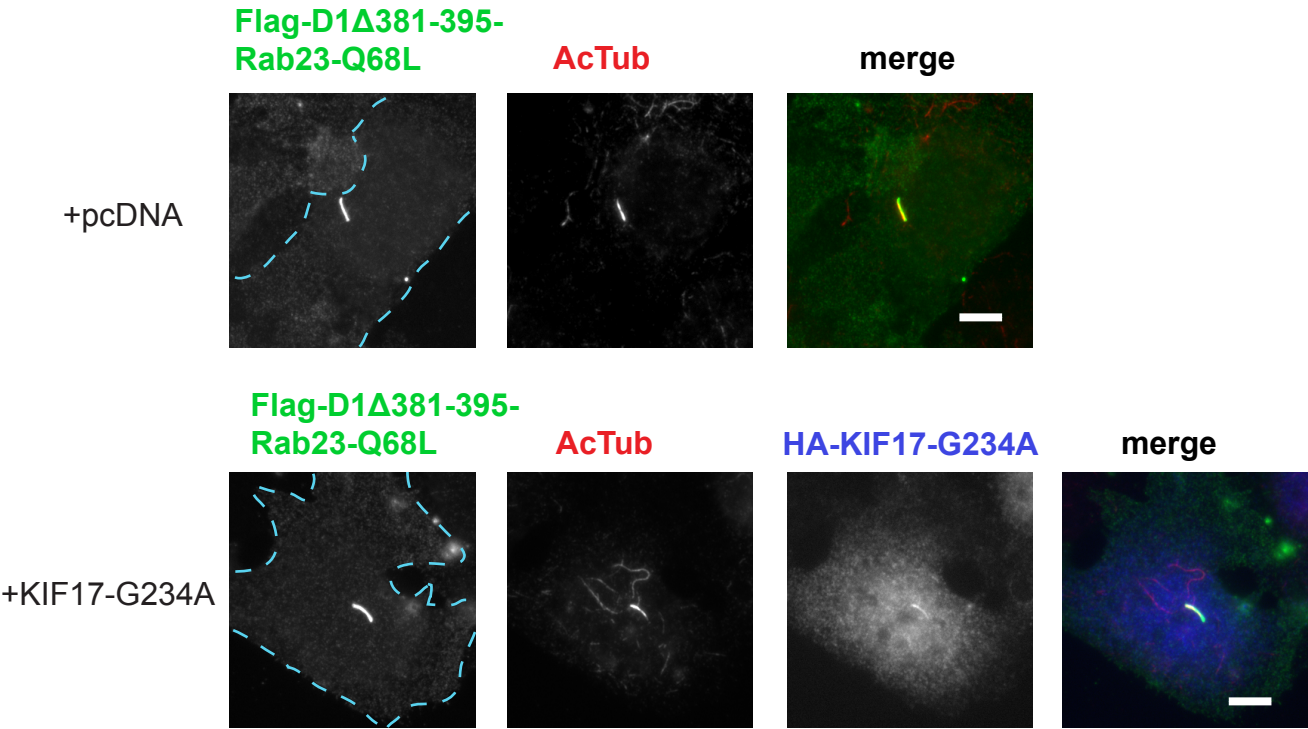

Supplement: supp [file elife-06996-supp-v1.zip › elife_poa_e06996_Figure_8_figure_supplement_1.pdf]

Figure 2- figure supplement 5

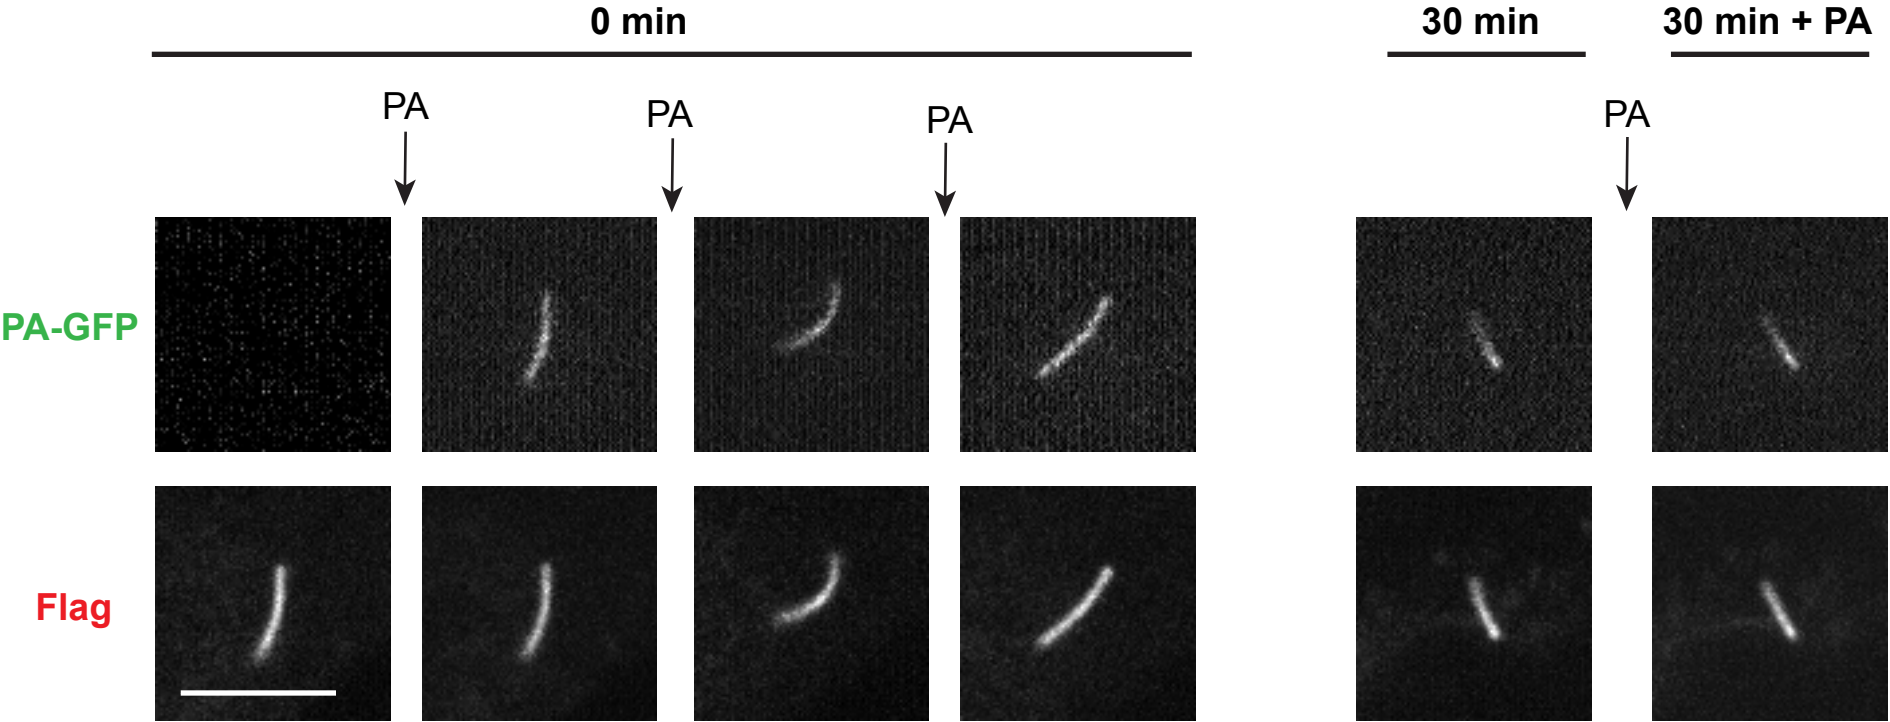

Supplement: supp [file elife-06996-supp-v1.zip › elife_poa_e06996_Figure_2_figure_supplement_5.pdf]

Figure 6- figure supplement 2

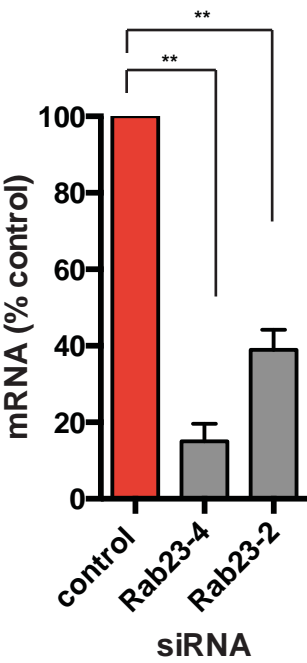

Supplement: supp [file elife-06996-supp-v1.zip › elife_poa_e06996_Figure_6_figure_supplement_2.pdf]
